# Supplementary material for: Conversion of biomass-derived levulinate esters to γ-valerolactone with a robust CuNi bimetallic catalyst
Source: Royal Society of Chemistry journal article supplement (doi:10.1039/d0nj02874f), 2020-01-01
Supplement: d0nj02874f1.pdf [file d0nj02874f1.pdf]

**New Journal of Chemistry**

ELECTRONIC SUPPORTING INFORMATION (ESI)

**Conversion of biomass-derived levulinate esters to  $\gamma$ -valerolactone with  
robust CuNi bimetallic catalyst**

Jie Li<sup>†</sup>, Shuai Zhang<sup>†</sup>, Ning-Zhao Shang<sup>\*</sup>, Shu-Tao Gao, Chun Wang<sup>\*</sup>, Zhi Wang

*College of Science, Hebei Agricultural University, Baoding 071001, China*

## Materials.

Levulinic acid (LA), ethyl levulinate (EL), butyl levulinate (BL), methyl levulinate (ML),  $\gamma$ -valerolactone,  $\text{Ni}(\text{NO}_3)_2 \cdot 6\text{H}_2\text{O}$ ,  $\text{Cu}(\text{NO}_3)_2 \cdot 3\text{H}_2\text{O}$ ,  $\text{ZrOCl}_2 \cdot 8\text{H}_2\text{O}$ ,  $\text{Al}(\text{NO}_3)_3 \cdot 9\text{H}_2\text{O}$ ,  $\text{Na}_2\text{CO}_3$ , 2-butyl alcohol, 2-propanol (2-PrOH), methanol (MeOH), ethanol (EtOH), and *tert*-butyl alcohol (*tert*- BuOH) were gained from Huaxin Co., Ltd (Baoding, China) and used as received without further purification.

## Characterization

The size and morphology of the samples were observed using transmission electron microscopy (TEM) using a JEOL model JEM-2011JHR) at 200 kV. The X-ray diffraction (XRD) patterns of the samples were recorded with a Rigaku D/max 2500 X-ray diffractometer using Cu K $\alpha$  radiation (40 kV, 150 mA) in the range  $2\theta = 5^\circ$ - $80^\circ$ . The surface area, total pore volume and pore size distribution of the samples were measured at 77 K using nitrogen adsorption with V-Sorb 2800P volumetric adsorption equipment (Jinaipu, China). The metal loading in the materials was analyzed by a T. J. A. ICP-9000 type inductively coupled plasma atomic emission spectroscopy (ICP-AES) instrument. X-ray photoelectron spectroscopy (XPS) was performed with a PHI 1600 spectroscope using a Mg K $\alpha$  X-ray source for excitation. GC analyses were carried out on a Shimadzu GC-2014-C series gas chromatograph (Shimadzu, Japan) equipped with a flame ionization detector (FID) and a split/splitless injector. All the separations were performed on a HP-5 capillary column (30 m  $\times$  0.25mm i.d.  $\times$  0.25  $\mu\text{m}$  film thickness) (WondaCap5) was employed to identify all reaction products. Ammonia-Temperature Programmed Desorption ( $\text{NH}_3$ -TPD) and Carbon dioxide-Temperature Programmed Desorption ( $\text{CO}_2$ -TPD) were analyzed by an Auto Chemical 2920 chemisorption analyzer.

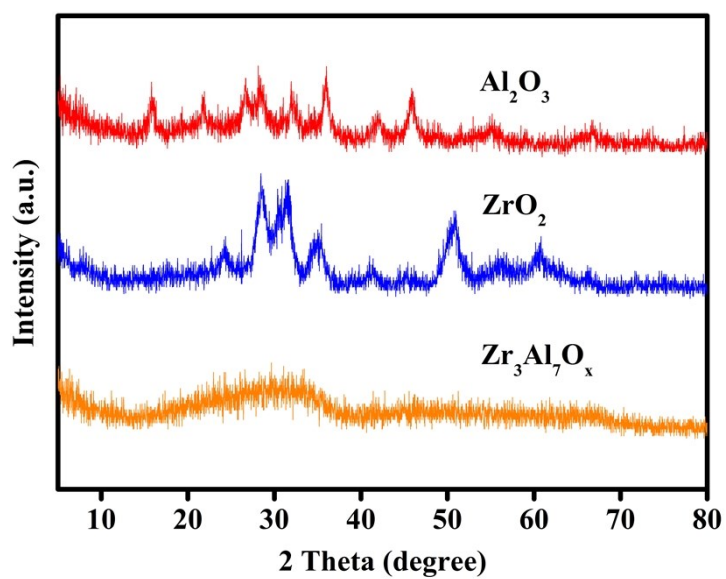

Fig. S1. The XRD images of different materials.

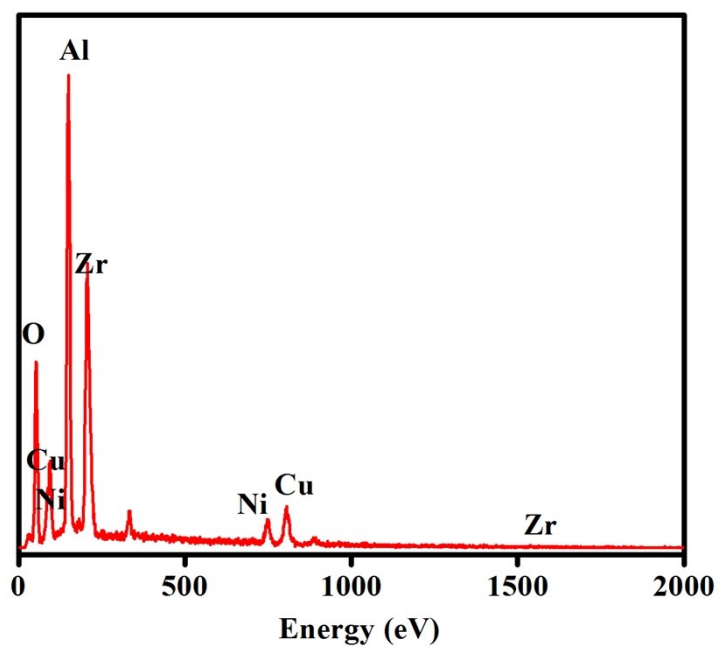

Fig. S2. The EDS elemental analysis of  $\text{Cu}_2\text{Ni}_1/\text{Zr}_3\text{Al}_7$  catalyst

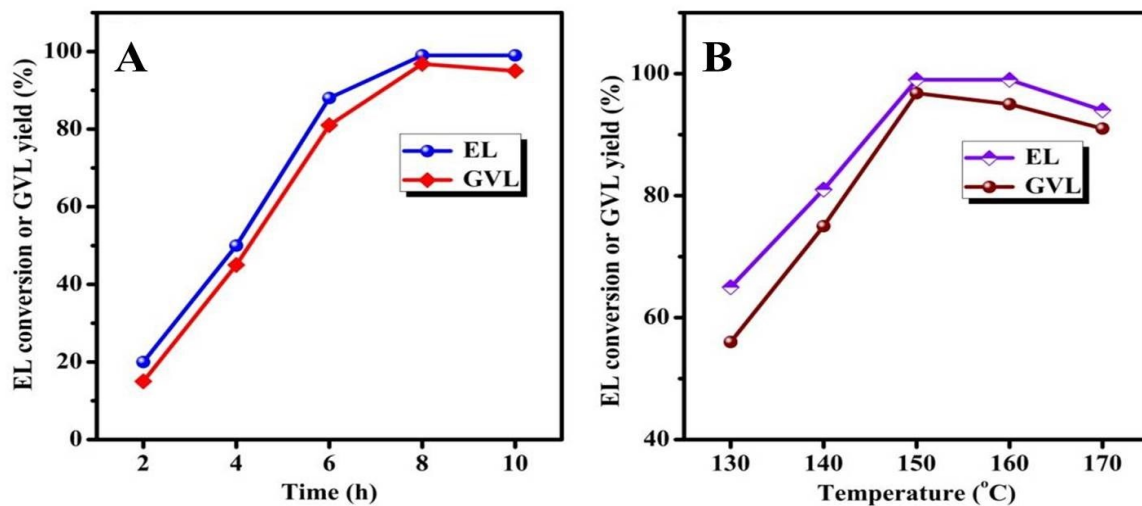

**Fig. S3.** Effect of reaction time (a) and reaction temperature (b) on the conversion of EL and yield of GVL. Reaction condition: EL 0.5 mmol, 50 mg  $\text{Cu}_2\text{Ni}_1/\text{Zr}_3\text{Al}_7\text{O}_z$ , 2-BuOH (3 mL); (a)150°C; (b)12 h.

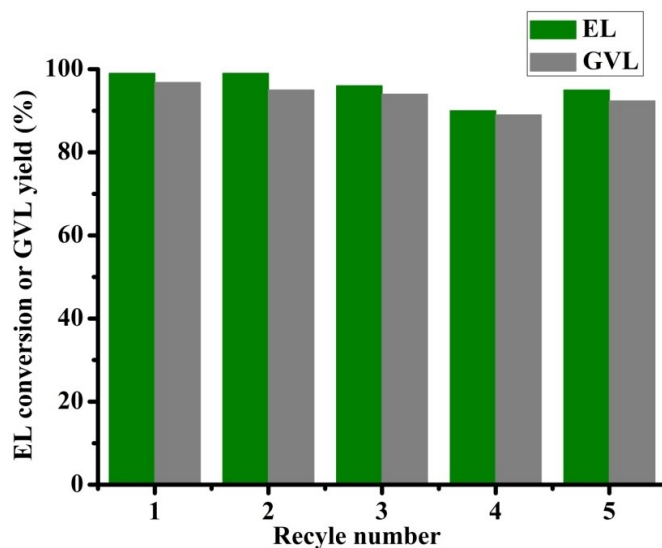

**Fig. S4.** Repetitiveness of  $\text{Cu}_2\text{Ni}_1/\text{Zr}_3\text{Al}_7\text{O}_z$  for the CTH of EL to GVL. 0.5 mmol, EL 3 mL, 2-BuOH, 50 mg  $\text{Cu}_2\text{Ni}_1/\text{Zr}_3\text{Al}_7\text{O}_z$ ,  $T=150^\circ\text{C}$ ,  $t=8$  h. The catalyst used for the fifth time was calcined at  $400^\circ\text{C}$  in  $\text{H}_2$  flow.

**Table S1** BET surface areas and acid strength of prepared catalyst.

| Entry | Samples                                                                       | BET<br>(m <sup>2</sup> g <sup>-1</sup> ) | Pore volume<br>(cm <sup>3</sup> g <sup>-1</sup> ) | Pore size<br>(nm) | <200°C<br>(μmolg <sup>-1</sup> ) | 300°C-400°C<br>(μmolg <sup>-1</sup> ) | Total<br>acidity<br>(μmolg <sup>-1</sup> ) |
|-------|-------------------------------------------------------------------------------|------------------------------------------|---------------------------------------------------|-------------------|----------------------------------|---------------------------------------|--------------------------------------------|
| 1     | Cu <sub>2</sub> Ni <sub>1</sub> /Al <sub>2</sub> O <sub>3</sub>               | 94                                       | 0.229                                             | 4.9               | 283.7                            | 0                                     | 283.7                                      |
| 2     | Cu <sub>2</sub> Ni <sub>1</sub> /ZrO <sub>2</sub>                             | 26                                       | 0.027                                             | 2.1               | 270.0                            | 0                                     | 270.0                                      |
| 3     | Cu <sub>2</sub> Ni <sub>1</sub> /Zr <sub>7</sub> Al <sub>3</sub> Oz           | 45                                       | 0.064                                             | 3.5               | 370.0                            | 0                                     | 370.0                                      |
| 4     | Cu <sub>2</sub> Ni <sub>1</sub> /Zr <sub>5</sub> Al <sub>5</sub> Oz           | 69                                       | 0.101                                             | 4.2               | 306.5                            | 0                                     | 306.5                                      |
| 5     | Cu <sub>2</sub> Ni <sub>1</sub> /Zr <sub>3</sub> Al <sub>7</sub> Oz           | 78                                       | 0.113                                             | 4.9               | 574.0                            | 0                                     | 574.0                                      |
| 6     | reused<br>Cu <sub>2</sub> Ni <sub>1</sub> /Zr <sub>3</sub> Al <sub>7</sub> Oz | 55                                       | 0.098                                             | 5.2               | -                                | -                                     | -                                          |
| 7     | Zr <sub>3</sub> Al <sub>7</sub> Oz                                            | 110                                      | 0.214                                             | 5.3               | -                                | -                                     | -                                          |
| 8     | Cu/Zr <sub>3</sub> Al <sub>7</sub> Oz                                         | 95                                       | 0.118                                             | 4.4               | -                                | -                                     | -                                          |
| 9     | Ni/Zr <sub>3</sub> Al <sub>7</sub> Oz                                         | 81                                       | 0.104                                             | 4.6               | -                                | -                                     | -                                          |

**Table S2** BET surface areas and base strength of prepared catalysts.

| Entry | Sample                                                                          | BET<br>(m <sup>2</sup> g <sup>-1</sup> ) | Pore<br>Volume<br>(cm <sup>3</sup> g <sup>-1</sup> ) | Pore Size<br>(nm) | <200°C<br>(μmolg <sup>-1</sup> ) | 300°C-400°C<br>(μmolg <sup>-1</sup> ) | Total<br>Basicity<br>(μmolg <sup>-1</sup> ) |
|-------|---------------------------------------------------------------------------------|------------------------------------------|------------------------------------------------------|-------------------|----------------------------------|---------------------------------------|---------------------------------------------|
| 1     | Cu <sub>2</sub> Ni <sub>1</sub> /Al <sub>2</sub> O <sub>3</sub>                 | 95                                       | 0.229                                                | 4.7               | 268.9                            | 0                                     | 268.9                                       |
| 2     | Cu <sub>2</sub> Ni <sub>1</sub> /ZrO <sub>2</sub>                               | 26                                       | 0.027                                                | 0.97              | 0                                | 53.7                                  | 53.7                                        |
| 3     | Cu <sub>2</sub> Ni <sub>1</sub> /Zr <sub>7</sub> Al <sub>3</sub> O <sub>z</sub> | 45                                       | 45                                                   | 0.064             | 24.1                             | 46                                    | 70.1                                        |
| 4     | Cu <sub>2</sub> Ni <sub>1</sub> /Al <sub>5</sub> Zr <sub>5</sub> O <sub>z</sub> | 69                                       | 69                                                   | 0.101             | 30.5                             | 0                                     | 30.5                                        |
| 5     | Cu <sub>2</sub> Ni <sub>1</sub> /Zr <sub>3</sub> Al <sub>7</sub> O <sub>z</sub> | 78                                       | 0.113                                                | 4.9               | 615.8                            | 0                                     | 615.8                                       |

**Table S3** Various reported catalyst tested for the CTH toward GVL

| Entry | Reactants       | Catalysts                                                                       | H donor    | Temp (°C) | Time (h) | Conv (%) | Yield (%) | Ref       |
|-------|-----------------|---------------------------------------------------------------------------------|------------|-----------|----------|----------|-----------|-----------|
| 1     | LA <sup>a</sup> | Ag-Ni/ZrO <sub>2</sub>                                                          | FA         | 220       | 5        | 99       | 99        | 1         |
| 2     | EL <sup>b</sup> | Zr(OH) <sub>4</sub>                                                             | ethanol    | 200       | 1        | 93       | 95        | 2         |
| 3     | LA              | RuN/SiO <sub>2</sub>                                                            | FA         | 150       | 12       | 92       | 89        | 3         |
| 4     | LA              | Ni <sub>5</sub> Zr <sub>5</sub>                                                 | 2-propanol | 200       | 3        | 96       | 94        | 4         |
| 5     | ML <sup>c</sup> | ZrO <sub>2</sub> /SBA-15<br>1.0 MpAr                                            | 2-propanol | 150       | 6        | >99      | 95        | 5         |
| 6     | EL              | Al <sub>2</sub> O <sub>3</sub> -ZrO <sub>2</sub>                                | 2-propanol | 220       | 4        | 96       | 83        | 6         |
| 7     | EL              | 10Cu-5Ni/Al <sub>2</sub> O <sub>3</sub>                                         | 2-BuOH     | 150       | 12       | >99      | 97        | 7         |
| 8     | EL              | Cu <sub>2</sub> Ni <sub>1</sub> /Zr <sub>3</sub> Al <sub>7</sub> O <sub>x</sub> | 2-BuOH     | 150       | 8        | >99      | 96.8      | This work |

<sup>a</sup> Levulinic acid, <sup>b</sup> Ethyl levulinate, <sup>c</sup> Methyl levulinate.

## References

1. T. Thananathanachon and T. B. Rauchfuss, *Angew. Chem. Int. Edit.*, 2010, **122**, 6766-6768.
2. X. Tang, H. Chen, L. Hu, W. Hao, Y. Sun, X. Zeng, L. Lin and S. Liu, *Appl. Catal B-Environ.*, 2014, **147**, 827-834.
3. L. Deng, Y. Zhao, J. Li, Y. Fu, B. Liao and Q. X. Guo, *ChemSusChem.*, 2010, **3**, 1172-1175.
4. H. Li, Z. Fang and S. Yang, *ChemPlusChem*, 2016, **81**, 135-142.
5. Y. Kuwahara, W. Kaburagi, Y. Osada, T. Fujitani and H. Yamashita, *Catal Today.*, 2017, **281**, 418-428.
6. J. He, H. Li, Y.-M. Lu, Y.-X. Liu, Z.-B. Wu, D.-Y. Hu and S. Yang, *Appl. Catal A- Gen.*, 2016, **510**, 11-19.
7. B. Cai, X.-C. Zhou, Y.-C. Miao, J.-Y. Luo, H. Pan and Y.-B. Huang, *ACS Sustainable Chem. Eng.*, 2016, **5**, 1322-1331.
